# Supplementary material
Source: ML conference proceedings conference paper supplement (https://openaccess.thecvf.com/content/WACV2022/html/Gomes_Creating_and_Reenacting_WACV_2022_paper.html)
Supplement: Supplementary file 1 [file Gomes_Creating_and_Reenacting_WACV_2022_supplemental.zip]

# Supplementary Material: Creating and Reenacting Controllable 3D Humans with Differentiable Rendering

Thiago L. Gomes<sup>1</sup>

Thiago M. Coutinho<sup>1</sup>

Rafael Azevedo<sup>1</sup>

Renato Martins<sup>2</sup>

Erickson R. Nascimento<sup>1</sup>

<sup>1</sup>Universidade Federal de Minas Gerais (UFMG), Brazil    <sup>2</sup> Universit Bourgogne Franche-Comt, France

{thiagoluange, thiagocoutinho, rafaelvieira}@dcc.ufmg.br,  
renato.martins@u-bourgogne.fr, erickson@dcc.ufmg.br

We provide in this document some supplementary material to our WACV submission. These qualitative results were not included in the paper submission due to page space restrictions. Section 1 shows image sequences of the rendering presented in Figure 5 of the paper, and Section 2 shows additional frames used to compute the metrics in Table 2. We also provide a video for more visual qualitative results and details.

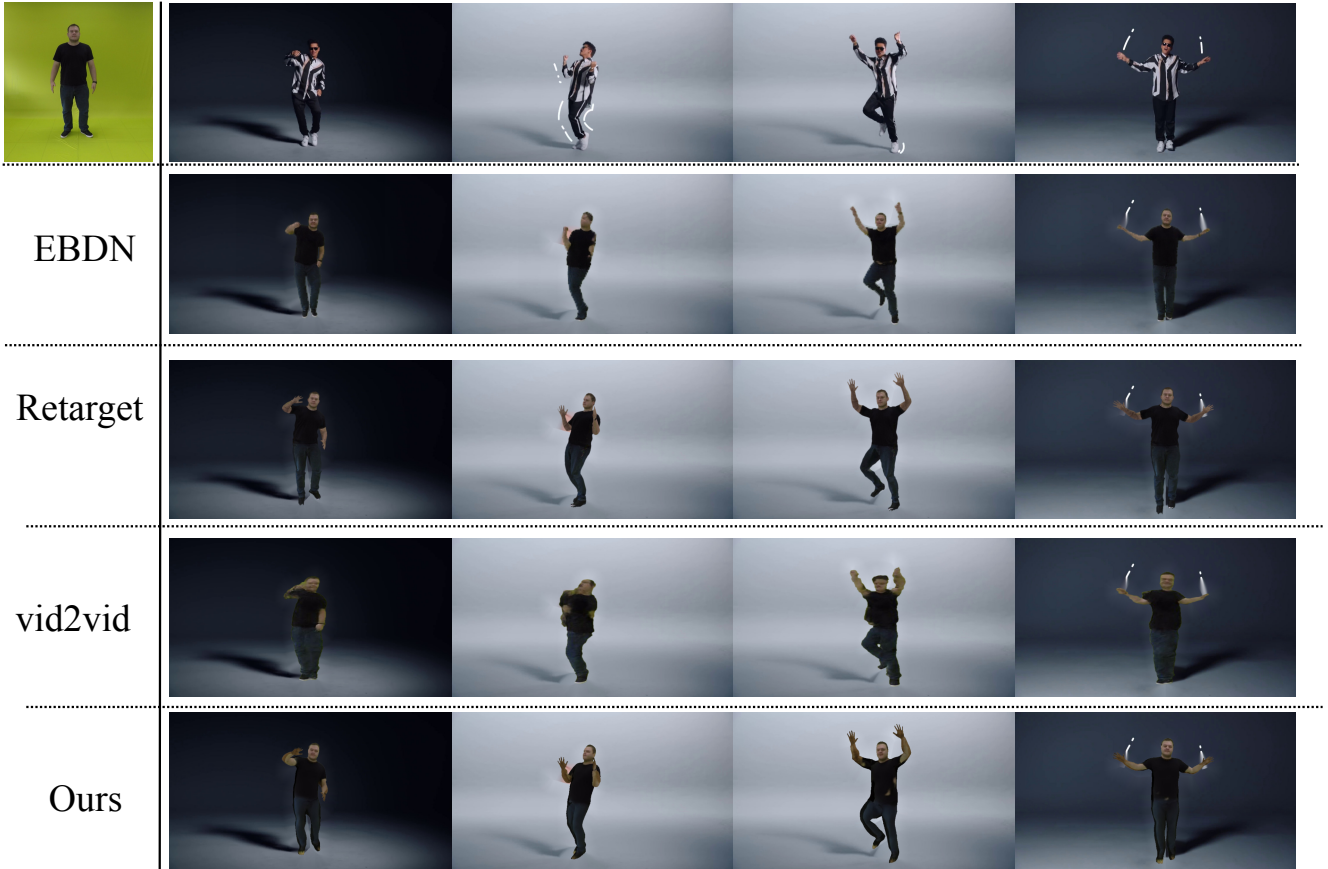

Figure 1: **Qualitative evaluation in bruno-mars sequence.** First row: original video and target actor; Second row: EBDN results; Third row: results of Retarget; Fourth row: results of vid2vid; Fifth row: Our results.

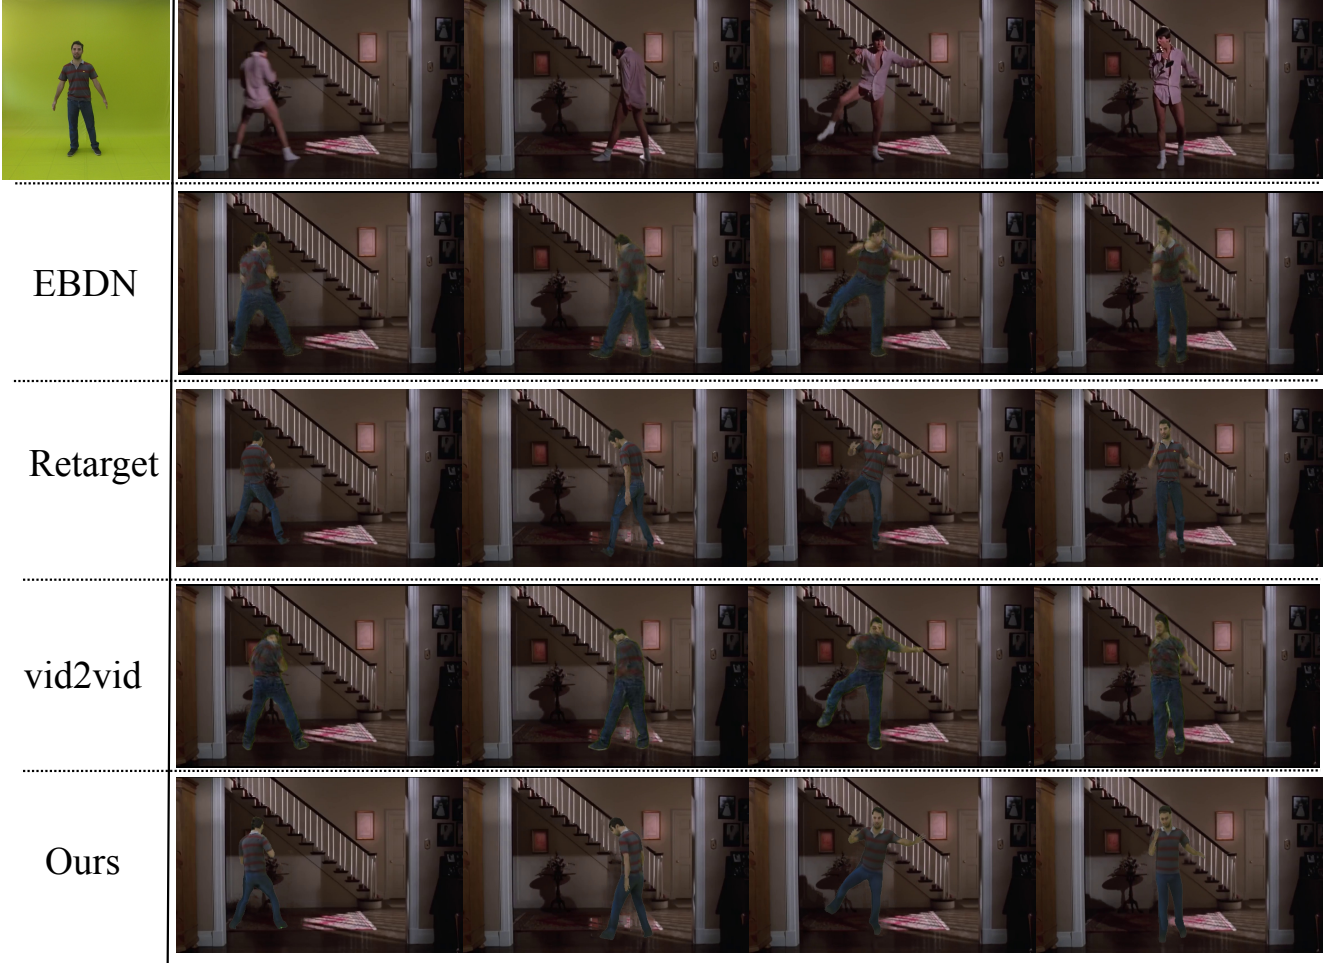

Figure 2: **Qualitative evaluation in tom-cruise sequence.** First row: original video and target actor; Second row: result of EBDN; Third row: results of Retarget; Fourth row: results of vid2vid; Fifth row: Our results.

## 1. Additional Qualitative Results

We start presenting examples from four YouTube videos that are publicly available (Figures 1 and 2). These results were introduced in Figure 5 (of the paper submission). We also performed the rendering and transferring in the publicly available videos using EBDN, Retarget, vid2vid, and our approach.

## 2. Qualitative Results in the Dataset Videos

In this section, we show the visual results of the quantitative metrics presented in the paper on Table 2 (Figures 3 and 4). We performed the transferring in the dataset videos using EBDN, Imper, Retarget, vi2vid, V-Unet, and our approach. One can notice the large discrepancy between the quality of the frames for the same method.

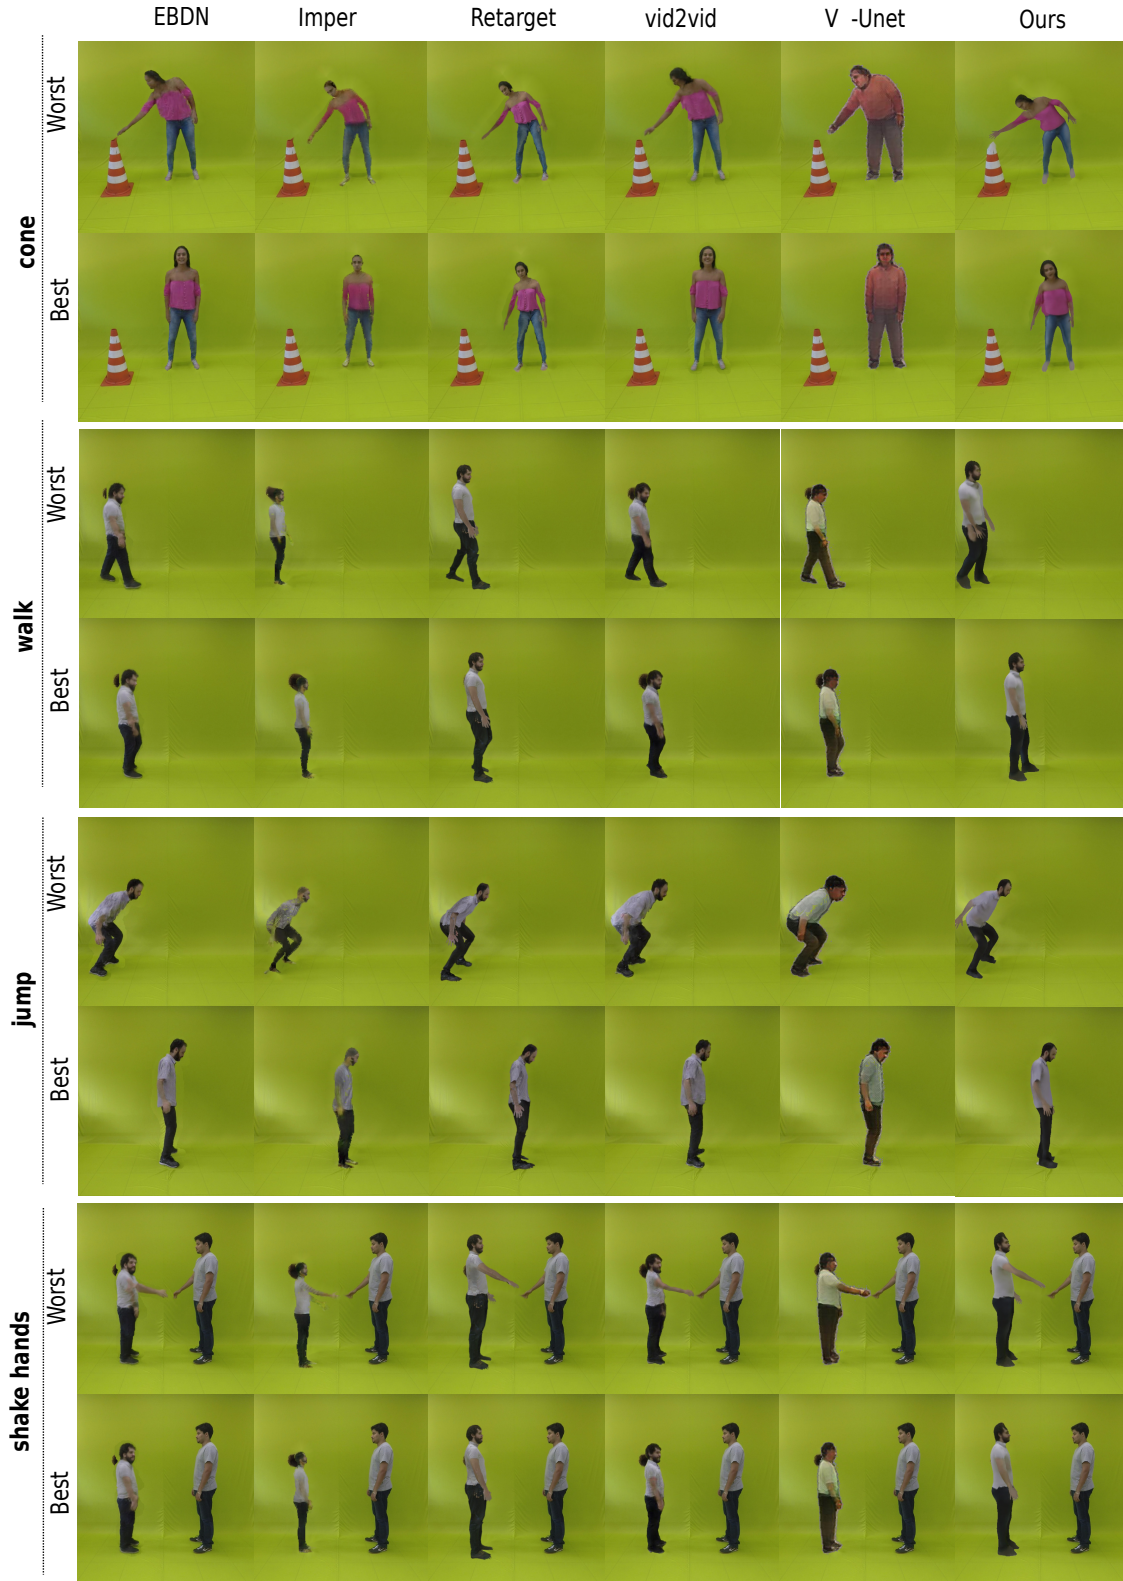

Figure 3: **Qualitative comparison in the controlled dataset.** Movements are represented in the rows. The results for each competitor are represented in the columns.



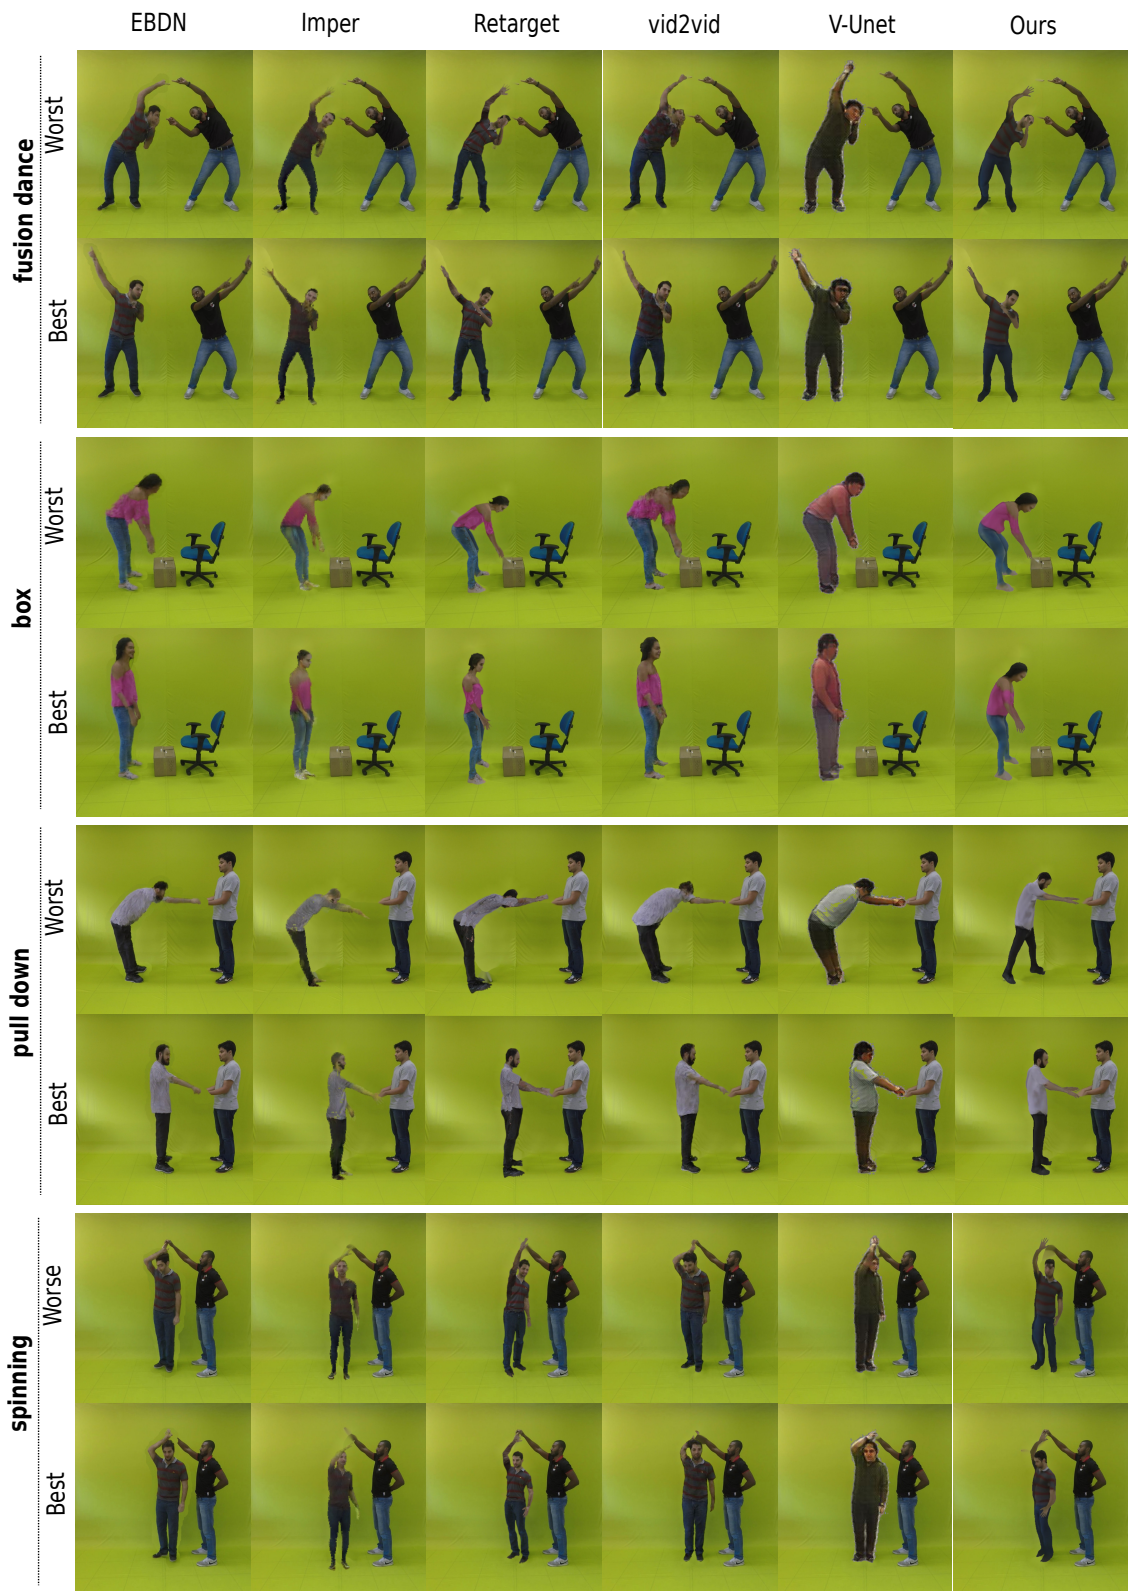

Figure 4: **Qualitative comparison in the controlled dataset.** Movements are represented in the rows. The results for each competitor are represented in the columns.
